# Supplementary material for: Characterization of a Novel Chimeric Theileria parva p67 Antigen Which Incorporates into Virus-like Particles and Is Highly Immunogenic in Mice
Source: MDPI journal article supplement (doi:10.3390/vaccines10020210), 2022-01-28
Supplement: s1 [file s1]

## Supplementary Materials

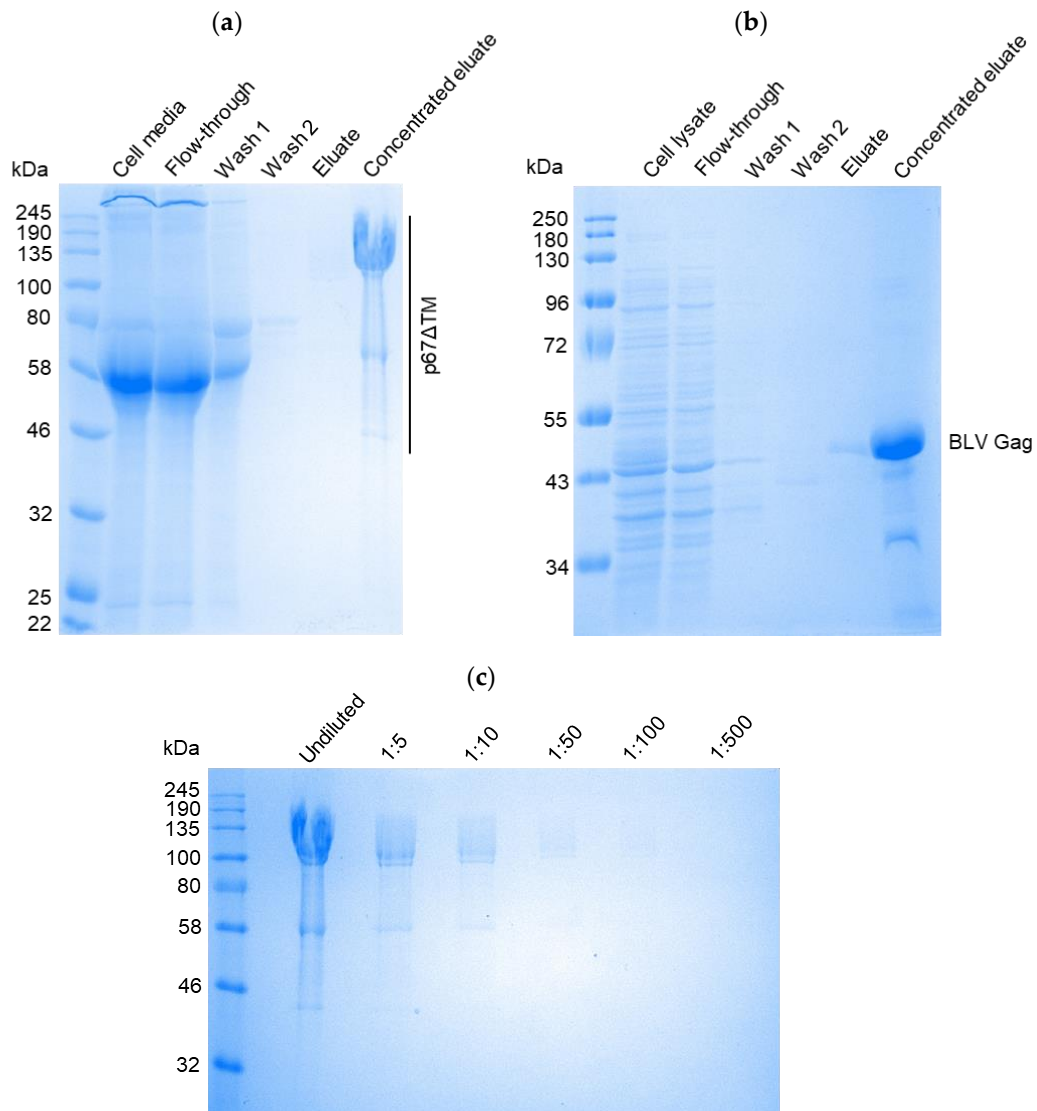

**Figure S1.** Purification of p67 $\Delta$ TM from HEK293T cells (a) and BLV Gag from *E. coli* (b). Samples taken before (cell media and cell lysate), during (flow-through, wash 1 and wash 2) and after (eluate and concentrated eluate) purification of His-tagged p67 $\Delta$ TM and BLV Gag through a cobalt-agarose column were used for SDS PAGE and Coomassie-blue staining. (c) Purified p67 $\Delta$ TM was diluted in TBS from 1:5 up to 1:500 and subjected to SDS PAGE and Coomassie-blue staining as undiluted purified sample results in overloading, as also seen in (a).
